# Supplementary material
Source: Springer Nature journal article supplement (https://www.springermedizin.de/resource/supplementary/12967_2013_1786_MOESM4_ESM.pdf/9574878)

# Supplemental Figure 4

**A**

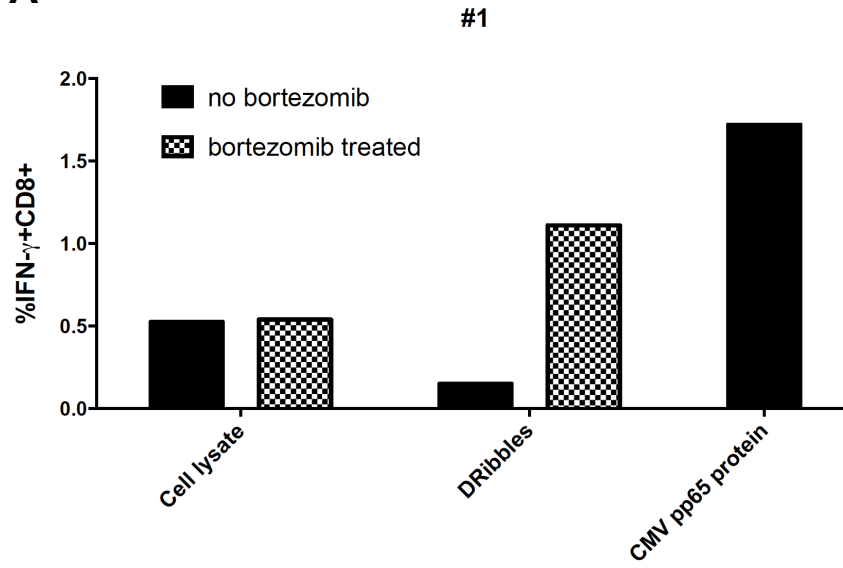

**B**

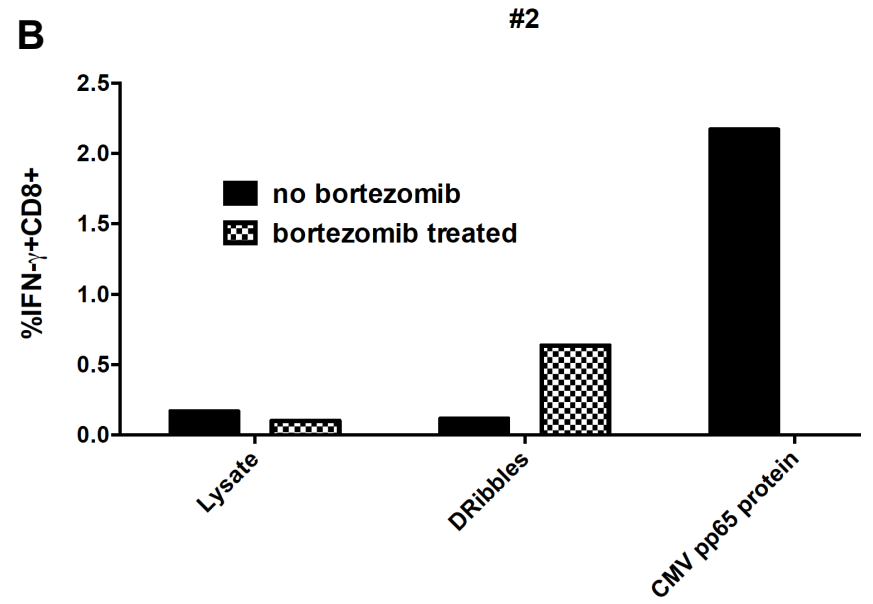

**C**

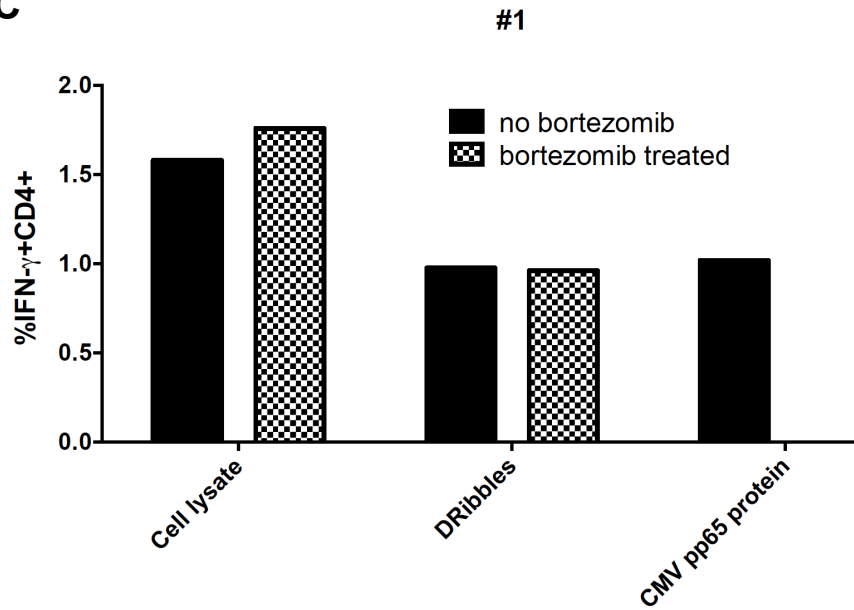

**D**

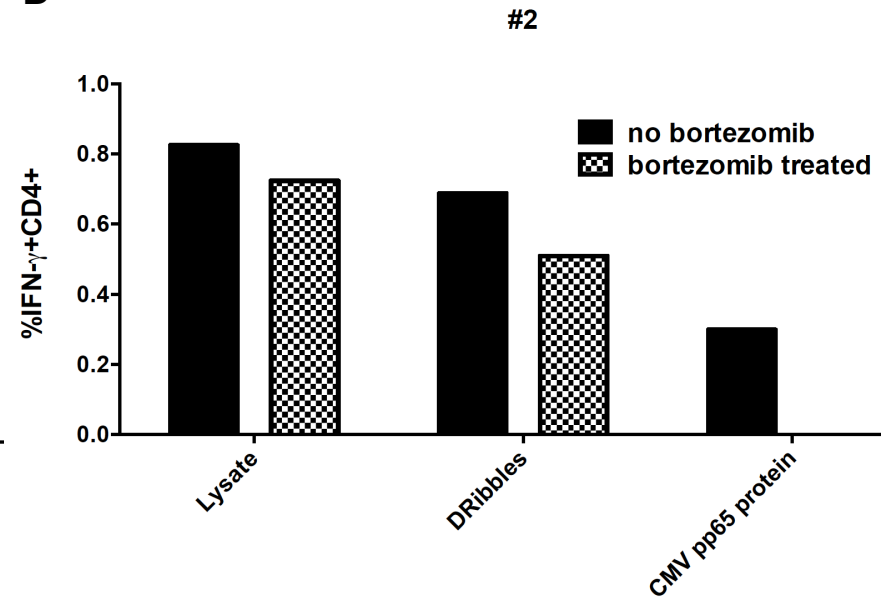

Supplement: MOESM4 [file 9574878]
